# Supplementary material for: Spatial modelling for population replacement of mosquito vectors at continental scale
Source: PLOS journal article supplement (doi:10.1371/journal.pcbi.1009526), 2022-06-01
Supplement: S3 (10.1371/journal.pcbi.1009526.s003) [file journal.pcbi.1009526.s003]

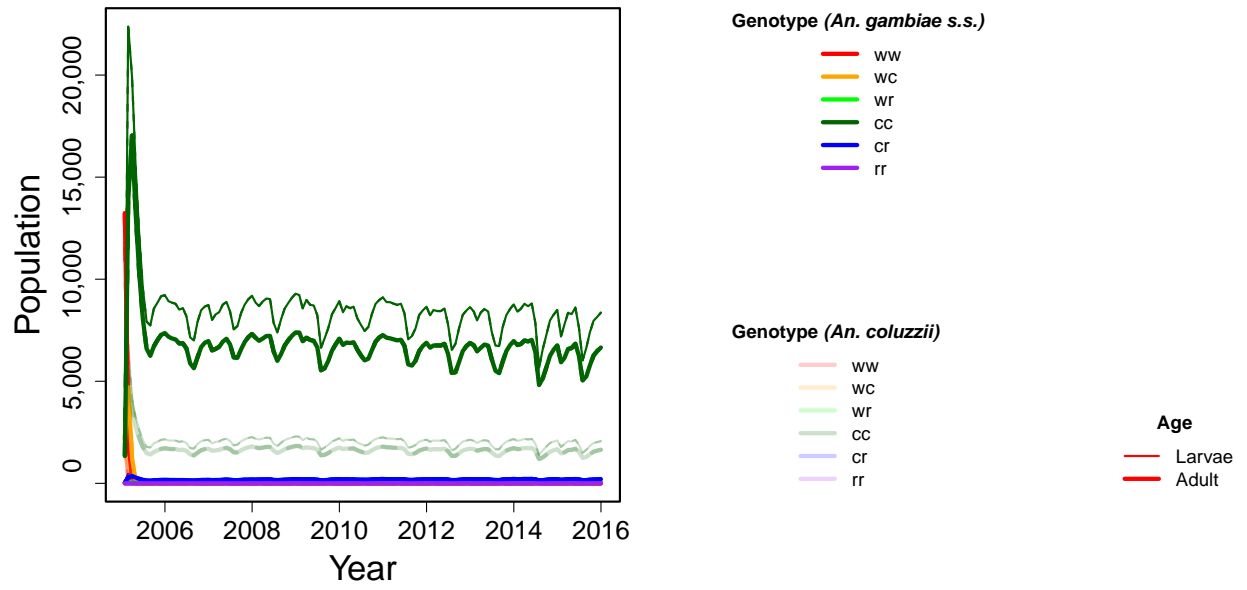

**S3 Figure.** Time series plot of Site 6 as in Figure S1 but with  $R(g_M, g_F) = 0.05$  where  $g_M \neq ww$  or  $g_F \neq ww$ . The colours correspond to genotype and the line thickness to age class.
